# Supplementary material for: Pendant amine bases speed up proton transfers to metals by splitting the barriers
Source: Royal Society of Chemistry journal article supplement (doi:10.1039/c2cc00044j), 2012-01-01
Supplement: c2cc00044j.pdf [file c2cc00044j.pdf]

## Supporting Information

# Pendant Amine Bases Speed up Proton Transfers to Metals by Splitting the Barriers

Ying Wang,<sup>a</sup> Mei Wang,<sup>b</sup> Licheng Sun,<sup>b,c</sup> and Mårten S. G. Ahlquist<sup>\*a</sup>

<sup>a</sup> Division of Theoretical Chemistry & Biology, School of Biotechnology, KTH Royal Institute of Technology, 106 91 Stockholm, Sweden.

<sup>b</sup> State Key Laboratory of Fine Chemicals, DUT-KTH Joint Education and Research Centre on Molecular Devices, Dalian University of Technology, 116012, Dalian, China.

<sup>c</sup> Department of Chemistry, School of Chemical Science and Engineering, KTH Royal Institute of Technology, 100 44, Stockholm, Sweden.

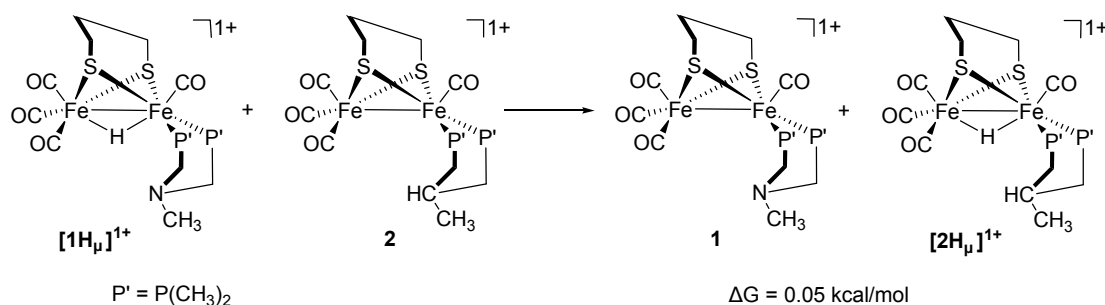

**Figure S1.**

From proton exchange equation between  $[1(H_{\mu})]^{1+}$  and  $[2(H_{\mu})]^{1+}$ , the free energy difference is only 0.05 kcal/mol, which indicates these two complexes  $[1(H_{\mu})]^{1+}$  and  $[2(H_{\mu})]^{1+}$  have almost identical pKa, and hence, it is not that the pKa of the hydride determining the rated of deprotonation.

**Table S1.** Natural Population Analysis of complexes in Figure 4.

|                                                         | H(migrated) | N(pendant amine) | N (aniline or anilineH <sup>+</sup> ) | Fe1 + Fe2 |
|---------------------------------------------------------|-------------|------------------|---------------------------------------|-----------|
| [1(H <sub>μ</sub> )] <sup>1+</sup> + aniline            | -0.1111     | -0.5199          | -0.8484                               | -0.6609   |
| <b>ts1</b> [1(H <sub>μ</sub> )] <sup>1+</sup> + aniline | 0.1240      | -0.4839          | -0.8484                               | -0.6751   |
| [1(H <sub>N</sub> )] <sup>1+</sup> + aniline            | 0.4695      | -0.4478          | -0.8484                               | -0.6908   |
| <b>ts2</b> [1-H <sub>N</sub> -aniline] <sup>1+</sup>    | 0.4742      | -0.5179          | -0.8627                               | -0.6407   |
| <b>1</b> + anilineH <sup>+</sup>                        | 0.4858      | -0.5146          | -0.7948                               | -0.6388   |
| <b>TS</b> [1-H <sub>μ</sub> -aniline] <sup>1+</sup>     | 0.1282      | -0.5376          | -0.8438                               | -0.6175   |

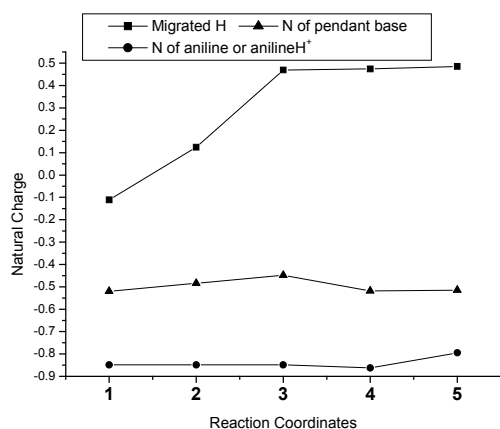

**Figure S2.** The chart of natural charges of complexes in path **B** of Figure 4. (1) [1(H<sub>μ</sub>)]<sup>1+</sup> + aniline; (2) **ts1** [1(H<sub>μ</sub>)]<sup>1+</sup> + aniline; (3) [1(H<sub>N</sub>)]<sup>1+</sup> + aniline; (4) **ts2** [1-H<sub>N</sub>-aniline]<sup>1+</sup>; (5) **1** + anilineH<sup>+</sup>.

Natural charges of N of pendant amine and N of aniline or aniline-H<sup>+</sup> change slightly. Only the natural charge on the migrated H changes significantly, from negative in [1(H<sub>μ</sub>)]<sup>1+</sup> to positive in [1(H<sub>N</sub>)]<sup>1+</sup>, until it finally goes to aniline, which it still carries a positive partial charge.

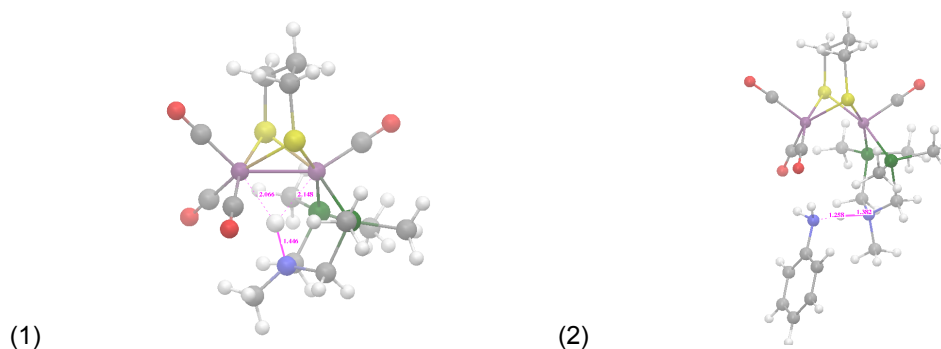

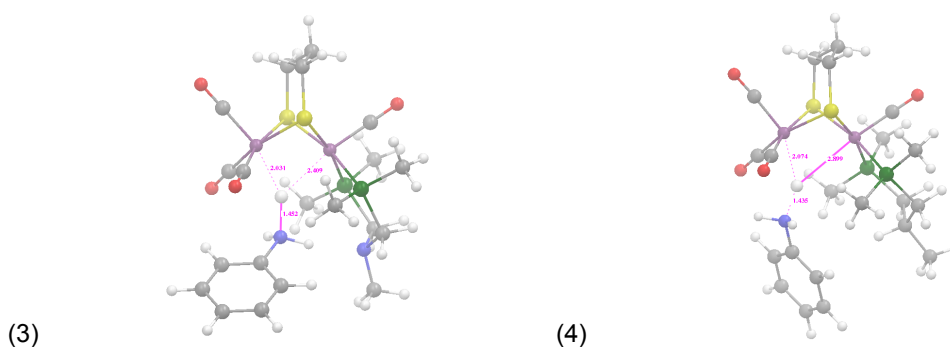

**Figure S3.** Optimized structures for the transition states. (1) **ts1** [**1(H<sub>μ</sub>)**]<sup>1+</sup>; (2) **ts2** [**1-H<sub>N</sub>-aniline**]<sup>1+</sup>; (3) **TS** [**1-H<sub>μ</sub>-aniline**]<sup>1+</sup>; (4) **TS** [**2-H<sub>μ</sub>-aniline**]<sup>1+</sup>; Purple = Fe; red = O; blue = N; green = P; yellow = S; grey = C; white = H. The bond lengths are given in Å.

**Theoretical Studies.** All Density Functional Theory (DFT) calculations were carried out with Jaguar 7.6 program package by Schrödinger LLC. For geometry optimizations, solvation energy, and frequency calculations, Becke's three-parameter hybrid functional and the LYP correlation functional (B3LYP)<sup>i</sup> was used with the LACVP\*\* core potential and basis set, while single point energy corrections were performed with the M06<sup>ii</sup> functional using the LACV3P\*\*\* basis set which, as suggested by Martin,<sup>iii</sup> was augmented with two f-polarization functions on Fe. Frequency calculations were performed on the optimized geometries to verify that the geometries correspond to minima or first-order saddle points (transition states) on the potential energy surface (PES). All transition states were confirmed to connect the reactants and products by the intrinsic reaction coordinate (IRC) calculations.<sup>iv</sup> The Gibbs free energies were defined as the following equation  $G = E(\text{M06/LACV3P***} + 2f \text{ on Fe}) + G_{\text{solv}} + \text{ZPE} + H_{298} + \text{TS}_{298}$ . The enthalpic energies were defined as the following equation  $H = E(\text{M06/LACV3P***} + 2f \text{ on Fe}) + G_{\text{solv}} + \text{ZPE} + H_{298}$ . The entropic energies were defined as  $S = \text{TS}_{298}$ . Based on the gas-phase-optimized structures, the effect of solvent was evaluated by single-point calculations using the Poisson-Boltzmann reactive field implemented in Jaguar 7.6 (PBF)<sup>v</sup> in dichloromethane

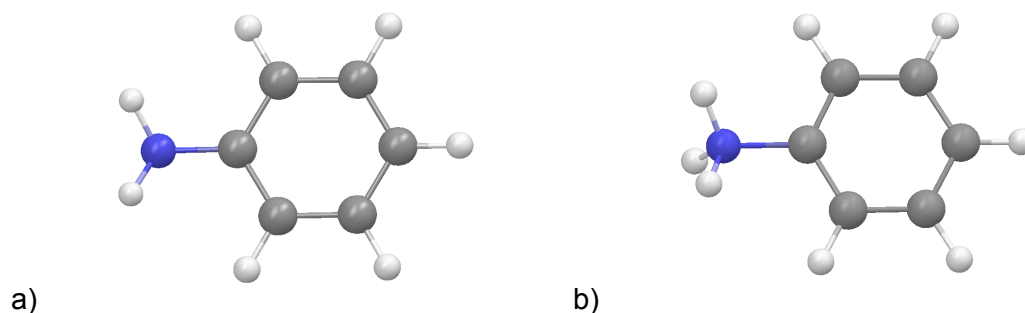

**Figure S4.** Optimized geometries of the 1) Ph-NH<sub>2</sub> and 2) Ph-NH<sub>3</sub><sup>+</sup>. Blue = N; Grey = C; White = H. The bond lengths are given in Å.

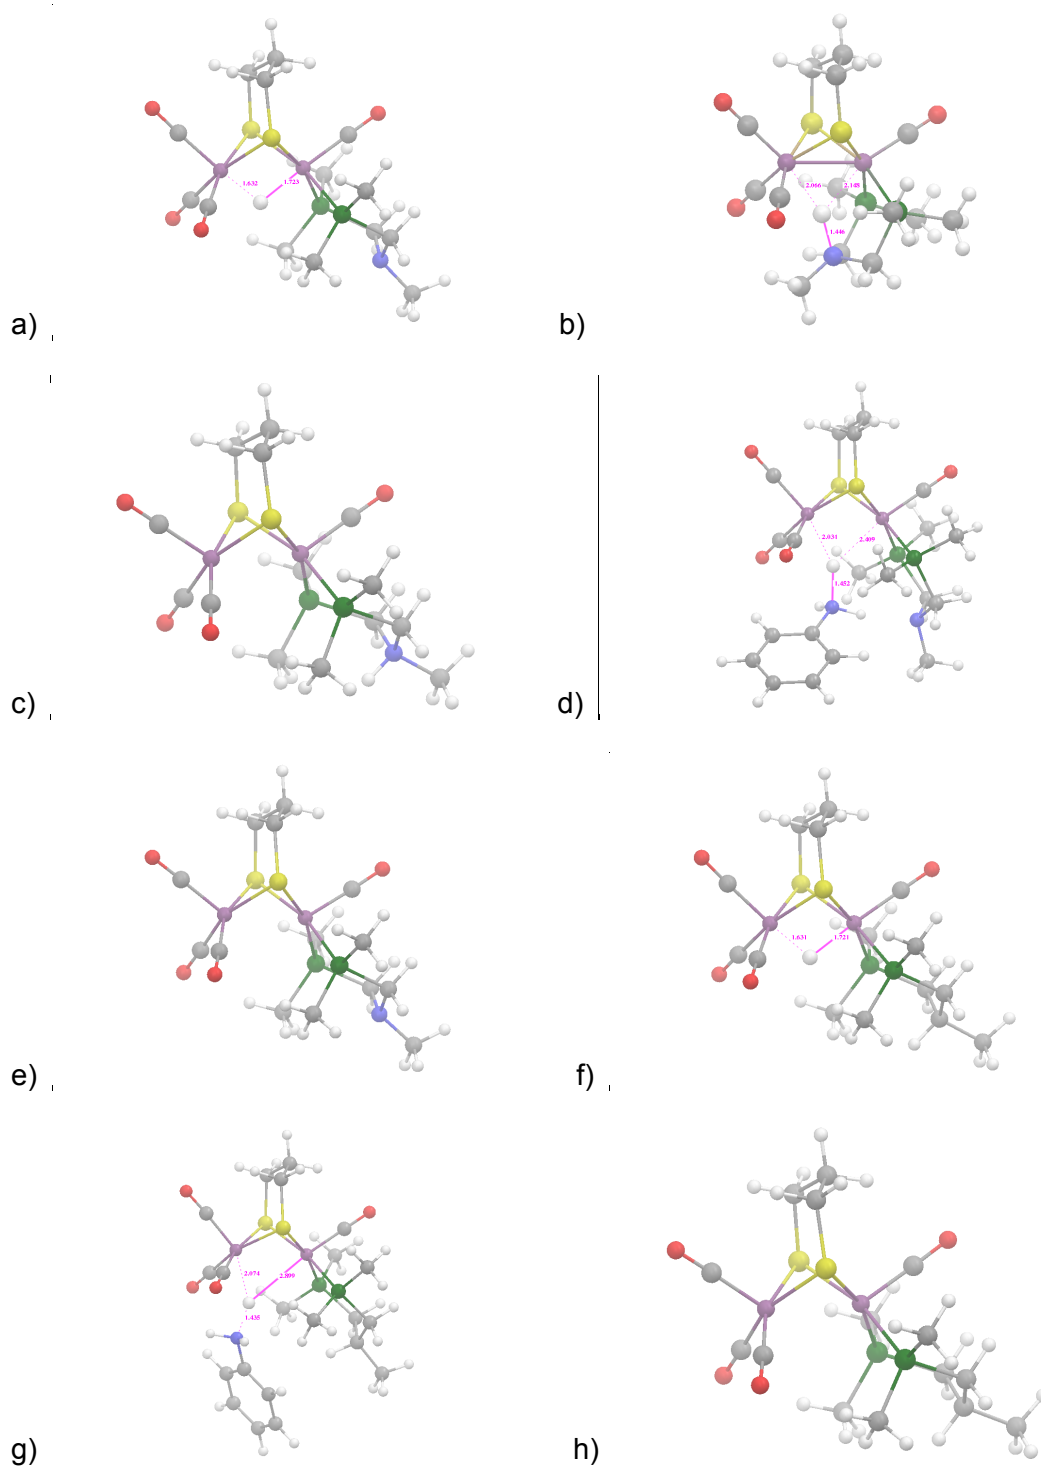

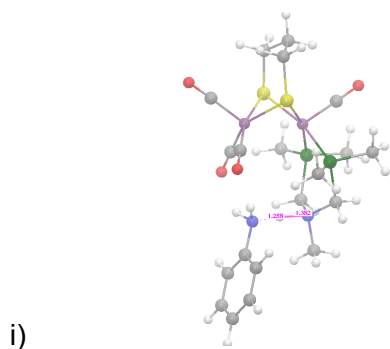

**Figure S5.** Optimized geometries of a)  $[1(H_{\mu})]^{1+}$ ; b) **ts1**  $[1(H_{\mu})]^{1+}$ ; c)  $[1(H_N)]^{1+}$ ; d) **TS**  $[1-H_{\mu}\text{-aniline}]^{1+}$ ; e) **1**; f)  $[2(H_{\mu})]^{1+}$ ; g) **TS**  $[2-H_{\mu}\text{-aniline}]^{1+}$ ; h) **2**; i) **ts2**  $[1-H_N\text{-aniline}]^{1+}$ . Purple = Fe; Red = O; Blue = N; Green = P; Yellow = S; Grey = C; White = H. The bond lengths are given in Å.

IRC-calculation results:

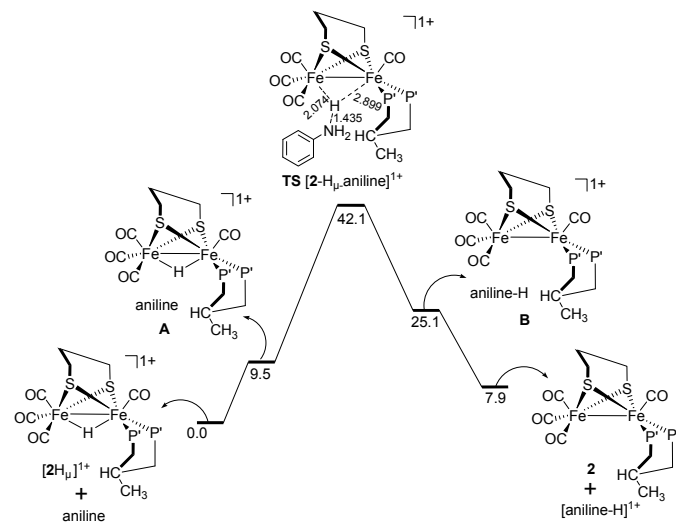

**Fig. S6** profiles of the calculated relative  $G$  for deprotonation of complexes  $[2(H_{\mu})]^{1+}$

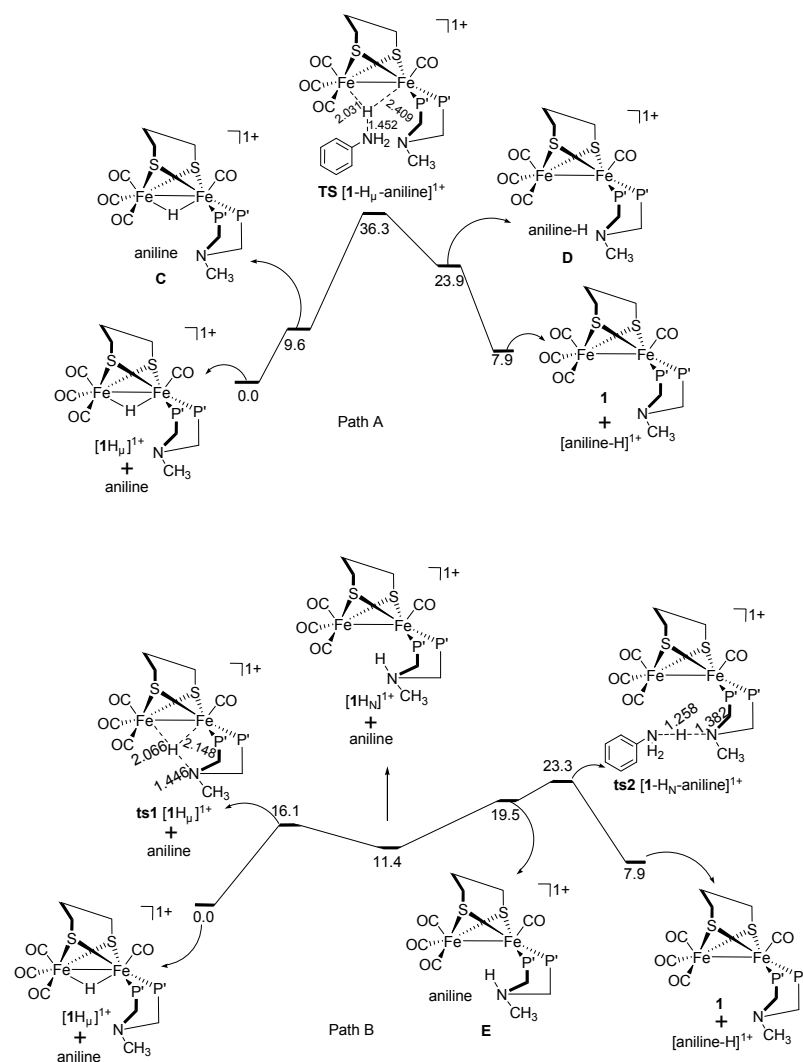

Fig. S7 Profiles of the calculated relative  $G$  for path A and B of deprotonation of complex  $[1(H\mu)]^{1+}$ .

### Cartesian coordinates of computed structures

Cartesian coordinates of Figure S4a

$E$  (M06/LACV3P\*\*++ 2f(Ru)) = -287.45803757358

ZPE (kcal mol<sup>-1</sup>) = 73.683

$G_{solv}$  = -0.010507

DH<sub>298</sub> (kcal mol<sup>-1</sup>) = 4.221

DS<sub>298</sub> (cal K<sup>-1</sup> mol<sup>-1</sup>) = 75.506

| atom | x             | y             | z             |
|------|---------------|---------------|---------------|
| C1   | 0.1540100300  | -0.0062842783 | -0.9309231110 |
| C2   | 0.0885825832  | 1.2057053096  | -0.2226778008 |
| C3   | -0.0421751223 | 1.2077906757  | 1.1637503344  |
| C4   | -0.1113324502 | 0.0093268852  | 1.8769680912  |

|     |               |               |               |
|-----|---------------|---------------|---------------|
| C5  | -0.0474906369 | -1.1965763937 | 1.1769287101  |
| C6  | 0.0835619731  | -1.2099208505 | -0.2095851727 |
| H7  | 0.1364215858  | 2.1460383497  | -0.7672047032 |
| H8  | -0.0890498457 | 2.1572116339  | 1.6906037664  |
| H9  | -0.2114650853 | 0.0151000455  | 2.9579390537  |
| H10 | -0.0980445190 | -2.1401613030 | 1.7139861011  |
| H11 | 0.1275203395  | -2.1564890070 | -0.7436174993 |
| H12 | 0.6338290154  | 0.8166991291  | -2.7352925006 |
| N13 | 0.2274925763  | -0.0142270286 | -2.3273365951 |
| H14 | 0.6248323508  | -0.8542051639 | -2.7260430826 |

Cartesian coordinates of **Figure S4b**

**E (M06/LACV3P\*\*\*+ 2f(Ru)) = -287.80037054226**

**ZPE (kcal mol<sup>-1</sup>) = 82.628**

**G<sub>solv</sub> = -0.1024214**

**DH<sub>298</sub> (kcal mol<sup>-1</sup>) = 4.512**

**DS<sub>298</sub> (cal K<sup>-1</sup> mol<sup>-1</sup>) = 80.401**

| atom | x             | y             | z             |
|------|---------------|---------------|---------------|
| C1   | 0.1270584904  | -0.0063625073 | -0.8741395422 |
| C2   | 0.0786173620  | 1.2210461659  | -0.2250108816 |
| C3   | -0.0288499246 | 1.2183581527  | 1.1665668448  |
| C4   | -0.0870293329 | 0.0100683512  | 1.8638579699  |
| C5   | -0.0368481241 | -1.2065945710 | 1.1806027218  |
| C6   | 0.0706066723  | -1.2260234006 | -0.2107933048 |
| H7   | 0.1236386914  | 2.1589040207  | -0.7726695194 |
| H8   | -0.0639548072 | 2.1617076165  | 1.7007843083  |
| H9   | -0.1687355822 | 0.0165666081  | 2.9458272496  |
| H10  | -0.0782604150 | -2.1434322554 | 1.7257584876  |
| H11  | 0.1095571070  | -2.1704475392 | -0.7475195688 |
| H12  | 0.7104481011  | 0.8137063565  | -2.7171784056 |
| N13  | 0.2150667144  | -0.0153615030 | -2.3698097298 |
| H14  | 0.7262773323  | -0.8392154422 | -2.7066253468 |
| H15  | -0.7137326669 | -0.0270883729 | -2.8109473752 |

Cartesian coordinates of **Figure S5a**

**E (M06/LACV3P\*\*\*+ 2f(Ru)) = -2630.45355880349**

**ZPE (kcal mol<sup>-1</sup>) = 245.91**

**G<sub>solv</sub> = -0.0581464**

**DH<sub>298</sub> (kcal mol<sup>-1</sup>) = 21.432**

**DS<sub>298</sub> (cal K<sup>-1</sup> mol<sup>-1</sup>) = 203.62**

| atom | x | y | z |
|------|---|---|---|
|------|---|---|---|

|     |               |               |               |
|-----|---------------|---------------|---------------|
| S1  | -6.1224945218 | 3.5446213421  | -1.6032465485 |
| Fe2 | -5.7687758580 | 1.2669511368  | -1.9964086136 |
| S3  | -7.9744970846 | 1.0079970894  | -1.2674491886 |
| Fe4 | -6.7042400965 | 2.2486613253  | 0.2550960878  |
| O5  | -8.9439283669 | 3.9921761475  | 1.0619617232  |
| C6  | -8.0710112252 | 3.3148678590  | 0.7684196649  |
| O7  | -4.6065618766 | 3.6499196198  | 1.7952177531  |
| C8  | -5.4278524795 | 3.1093906553  | 1.2130190677  |
| O9  | -7.1757816865 | 0.1289544467  | 2.2600169826  |
| C10 | -6.9962230702 | 0.9602865738  | 1.4969119376  |
| O11 | -6.1066282882 | 1.1245776079  | -4.8925525191 |
| C12 | -5.9782898347 | 1.1852498869  | -3.7478503612 |
| N13 | -2.7320068637 | -1.0221770559 | -2.5525557296 |
| C14 | -1.5905601242 | -1.8960683438 | -2.8594324450 |
| H15 | -1.7026917187 | -2.8432826497 | -2.3253423371 |
| H16 | -1.4904208802 | -2.1123736650 | -3.9365778674 |
| H17 | -0.6669843676 | -1.4240097733 | -2.5141280906 |
| C18 | -4.0030591706 | -1.6533420083 | -2.8962186206 |
| H19 | -3.9319202718 | -2.7259600076 | -2.6884330192 |
| H20 | -4.2608079387 | -1.5487008408 | -3.9672907125 |
| C21 | -2.5784319778 | 0.2984267777  | -3.1561116121 |
| H22 | -2.8903877623 | 0.3263857377  | -4.2175186306 |
| H23 | -1.5204409262 | 0.5787700054  | -3.1271092024 |
| P24 | -5.4311147811 | -1.0138432786 | -1.8813427241 |
| P25 | -3.5020908695 | 1.6317863581  | -2.2357494845 |
| C26 | -6.8099548716 | -2.0546888455 | -2.5225198585 |
| H27 | -7.0392315281 | -1.7759494732 | -3.5545509883 |
| H28 | -6.5430177452 | -3.1154689296 | -2.4888544274 |
| H29 | -7.7045430028 | -1.8920445679 | -1.9178270391 |
| C30 | -5.0809757839 | -1.7323284839 | -0.2219752949 |
| H31 | -4.9608683841 | -2.8177928454 | -0.2927063788 |
| H32 | -4.1601119213 | -1.2990753154 | 0.1742630429  |
| H33 | -5.9004856659 | -1.5154294284 | 0.4658084433  |
| C34 | -3.0385408899 | 3.1197693453  | -3.2187350303 |
| H35 | -3.5045493676 | 3.0742322235  | -4.2067232963 |
| H36 | -3.3953713336 | 4.0197420090  | -2.7137124052 |
| H37 | -1.9525612603 | 3.1830111114  | -3.3378275550 |
| C38 | -2.5067857737 | 1.8027038939  | -0.6955028844 |
| H39 | -1.4571206443 | 1.9954341860  | -0.9378214303 |
| H40 | -2.8833722805 | 2.6296788260  | -0.0905068068 |
| H41 | -2.5729531444 | 0.8793359405  | -0.1160716606 |
| C42 | -7.6593972886 | 4.2044098355  | -2.3968090645 |
| H43 | -8.1815761972 | 4.7925841806  | -1.6359952617 |
| H44 | -7.2913470638 | 4.9085321801  | -3.1485153471 |



|     |               |              |               |
|-----|---------------|--------------|---------------|
| C45 | -9.1745061275 | 2.1289656179 | -2.1224007867 |
| H46 | -9.8162495861 | 1.4501983362 | -2.6913922796 |
| H47 | -9.7969895072 | 2.5799720400 | -1.3435822760 |
| C48 | -8.5877028782 | 3.1866260405 | -3.0518924015 |
| H49 | -9.4282781354 | 3.7422168942 | -3.4897564298 |
| H50 | -8.0752463995 | 2.7021472065 | -3.8869610053 |
| H51 | -5.4976398582 | 1.2971816843 | -0.2956436141 |

Cartesian coordinates of **Figure S5b**

**E (M06/LACV3P\*\*++ 2f(Ru)) = -2630.42225560999**

**ZPE (kcal mol<sup>-1</sup>) = 244.926**

**G<sub>solv</sub> = -0.0643015**

**DH<sub>298</sub> (kcal mol<sup>-1</sup>) = 21.009**

**DS<sub>298</sub> (cal K<sup>-1</sup> mol<sup>-1</sup>) = 197.791**

| atom | x             | y             | z             |
|------|---------------|---------------|---------------|
| H35  | -0.0421941903 | -0.0385617606 | -0.0143474036 |
| N13  | -0.0702182259 | -0.0042162456 | 1.4314231362  |
| Fe2  | 1.7770667600  | 0.0032489680  | -1.1558135205 |
| Fe4  | -0.6623943032 | -0.2452459925 | -1.9737075654 |
| S3   | 1.0695987568  | -1.7036485478 | -2.5373021185 |
| S1   | 0.8107867931  | 1.4083122175  | -2.7104547992 |
| O5   | -2.1141733989 | -0.5171370513 | -4.5236818718 |
| C6   | -1.5486521348 | -0.4124693340 | -3.5323564830 |
| O7   | -2.3281628080 | 1.8971585195  | -0.8503724657 |
| C8   | -1.6867746309 | 1.0463908217  | -1.2868396144 |
| O9   | -1.9204766860 | -2.5011825300 | -0.5763250146 |
| C10  | -1.4441101197 | -1.6069936022 | -1.1239910488 |
| O11  | 4.6063999549  | 0.1872316011  | -1.8332300858 |
| C12  | 3.4866026765  | 0.1148869208  | -1.5627443117 |
| C14  | -1.4464525644 | 0.0146382910  | 1.9809698202  |
| H15  | -1.4372520500 | -0.0217732079 | 3.0760451294  |
| H16  | -1.9512501115 | 0.9258746176  | 1.6565768177  |
| H17  | -1.9957727226 | -0.8491575559 | 1.6026572862  |
| P18  | 1.7939796313  | 1.7281406972  | 0.3356063405  |
| P19  | 2.0552678562  | -1.5253260171 | 0.5239476391  |
| C20  | 1.2941695194  | 1.0708438883  | -4.4646117866 |
| H21  | 0.3667172523  | 1.0335242591  | -5.0445302540 |
| H22  | 1.8325140550  | 1.9713096714  | -4.7737149437 |
| C23  | 1.5057938647  | -1.4861282898 | -4.3229423585 |
| H24  | 2.1869667135  | -2.3147582487 | -4.5362410658 |
| H25  | 0.5897623685  | -1.6648186964 | -4.8945282895 |
| C26  | 2.1541971041  | -0.1628180640 | -4.7106338092 |
| H27  | 2.3799885494  | -0.2038152194 | -5.7851256628 |
| H28  | 3.1144073505  | -0.0549993993 | -4.1979677068 |
| C29  | 0.6413675253  | -1.2613744563 | 1.7450032062  |

|     |               |               |               |
|-----|---------------|---------------|---------------|
| H30 | -0.0632742268 | -2.0868825204 | 1.6186535038  |
| H31 | 0.9935744245  | -1.2656397967 | 2.7836291916  |
| C32 | 0.7128591346  | 1.2018767496  | 1.7956616572  |
| H33 | 1.3240641649  | 1.0152321316  | 2.6858737845  |
| H34 | 0.0220236356  | 2.0142536929  | 2.0315811331  |
| C39 | 1.0599703974  | 3.3636643599  | -0.1084429228 |
| H40 | 1.0940230356  | 4.0302853040  | 0.7589665911  |
| H41 | 1.6292750685  | 3.8111664940  | -0.9257311540 |
| H42 | 0.0260538348  | 3.2546819933  | -0.4392405326 |
| C42 | 3.3715845286  | 2.2822258997  | 1.1165491553  |
| H43 | 3.1854284225  | 2.9731663969  | 1.9442436076  |
| H44 | 3.9658480966  | 1.4400652868  | 1.4728943527  |
| H45 | 3.9588173094  | 2.8065727051  | 0.3565719518  |
| C45 | 3.5635387758  | -1.4780615235 | 1.5898136499  |
| H46 | 3.5329410036  | -2.2735730970 | 2.3401408055  |
| H47 | 4.4493575856  | -1.6222438318 | 0.9645746561  |
| H48 | 3.6607363882  | -0.5196297379 | 2.1027198084  |
| C48 | 1.9325933235  | -3.3345329412 | 0.1898602616  |
| H49 | 1.9652782358  | -3.8935612635 | 1.1299089155  |
| H50 | 1.0120674189  | -3.5694466645 | -0.3462618415 |
| H51 | 2.7737313511  | -3.6416761596 | -0.4366298775 |

Cartesian coordinates of **Figure S5c**

**E (M06/LACV3P\*\*\*+ 2f(Ru)) = -2630.41563279857**

**ZPE (kcal mol<sup>-1</sup>) = 249.449**

**G<sub>solv</sub> = -0.0829222**

**DH<sub>298</sub> (kcal mol<sup>-1</sup>) = 21.326**

**DS<sub>298</sub> (cal K<sup>-1</sup> mol<sup>-1</sup>) = 204.494**

| atom | x             | y             | z             |
|------|---------------|---------------|---------------|
| S1   | -6.1712680787 | 3.5411302298  | -1.7054425923 |
| Fe2  | -5.7924378975 | 1.2843798927  | -1.9947406232 |
| S3   | -7.9987009256 | 1.0361810408  | -1.3700835737 |
| Fe4  | -6.7844705760 | 2.2941921530  | 0.1385733363  |
| O5   | -8.9166690651 | 3.9935203542  | 1.2409838549  |
| C6   | -8.0835900055 | 3.3297794796  | 0.8088085287  |
| O7   | -4.4885502999 | 3.4646177639  | 1.5377340554  |
| C8   | -5.3871057063 | 2.9902616870  | 0.9876573058  |
| O9   | -6.9855702083 | 0.0336735409  | 1.9955470434  |
| C10  | -6.8918725891 | 0.9225598329  | 1.2632572019  |
| O11  | -5.9292024046 | 0.9965301897  | -4.8901337920 |
| C12  | -5.8826584688 | 1.1170295038  | -3.7348376296 |
| N13  | -2.7436323814 | -1.0210999812 | -2.5851029189 |
| C14  | -1.6976090346 | -1.8762653190 | -3.2556854830 |
| H15  | -1.7616398041 | -2.8909902479 | -2.8611308746 |

|     |               |               |               |
|-----|---------------|---------------|---------------|
| H16 | -1.8922264442 | -1.8774705189 | -4.3286787614 |
| H17 | -0.7118259817 | -1.4559662366 | -3.0532793565 |
| C18 | -4.1261814252 | -1.6222754881 | -2.7697912567 |
| H19 | -4.0200081400 | -2.6974038295 | -2.6019611903 |
| H20 | -4.4065334007 | -1.4529509495 | -3.8122198680 |
| C21 | -2.6294623666 | 0.4232981872  | -3.0414039576 |
| H22 | -3.0036322539 | 0.4596627524  | -4.0673891610 |
| H23 | -1.5625462364 | 0.6621693111  | -3.0453770052 |
| P24 | -5.4602578838 | -0.9129373314 | -1.6313218167 |
| P25 | -3.5735389315 | 1.6726135966  | -1.9789183133 |
| C26 | -6.8002973712 | -2.0857207701 | -2.1123327101 |
| H27 | -7.1208423608 | -1.8790424942 | -3.1364889112 |
| H28 | -6.4850613059 | -3.1293812985 | -2.0196749645 |
| H29 | -7.6563637743 | -1.9072435304 | -1.4579247444 |
| C30 | -4.8861371160 | -1.6469103985 | -0.0262167002 |
| H31 | -4.6579263289 | -2.7140011086 | -0.1207105106 |
| H32 | -4.0164040728 | -1.1157069982 | 0.3722819220  |
| H33 | -5.6817987922 | -1.5276937738 | 0.7121273021  |
| C34 | -2.9545410256 | 3.1889408225  | -2.8275432213 |
| H35 | -3.3784668110 | 3.2479784205  | -3.8330703837 |
| H36 | -3.3115016833 | 4.0572413879  | -2.2692596861 |
| H37 | -1.8618773949 | 3.2149177205  | -2.8772954129 |
| C38 | -2.4992529232 | 1.6326790092  | -0.4656805128 |
| H39 | -1.4356993408 | 1.7129644481  | -0.7148754932 |
| H40 | -2.7698457734 | 2.4768060969  | 0.1720593104  |
| H41 | -2.6735278930 | 0.7308141329  | 0.1290252585  |
| C42 | -7.6736025355 | 4.1779913657  | -2.5791084926 |
| H43 | -8.2297238837 | 4.7575687499  | -1.8355021807 |
| H44 | -7.2910468956 | 4.8809985647  | -3.3245745756 |
| C45 | -9.1789694703 | 2.1140582579  | -2.3034138020 |
| H46 | -9.8139892011 | 1.4209413037  | -2.8625573840 |
| H47 | -9.8058354215 | 2.5972039772  | -1.5472676660 |
| C48 | -8.5667511917 | 3.1405799324  | -3.2490835658 |
| H49 | -9.3904609891 | 3.6755004422  | -3.7421808279 |
| H50 | -8.0131247131 | 2.6306773181  | -4.0431133567 |
| H51 | -2.5367987734 | -1.0391045077 | -1.5804125669 |

Cartesian coordinates of **Figure S5d**

**E (M06/LACV3P\*\*\*+ 2f(Ru)) = -2917.88586852164**

**ZPE (kcal mol<sup>-1</sup>) = 319.984**

**G<sub>solv</sub> = -0.060626**

**DH<sub>298</sub> (kcal mol<sup>-1</sup>) = 25.365**

**DS<sub>298</sub> (cal K<sup>-1</sup> mol<sup>-1</sup>) = 231.003**

atom                      x                                              y                                              z

|     |               |               |               |
|-----|---------------|---------------|---------------|
| S1  | -6.0213103391 | 3.5489457332  | -1.9386573553 |
| Fe2 | -6.0445821221 | 1.2665812292  | -2.2161344810 |
| S3  | -8.2407529006 | 1.3582756350  | -1.5423540882 |
| Fe4 | -6.8994829107 | 2.5282757146  | -0.0246007606 |
| O5  | -8.8644324472 | 4.6450934307  | 0.5793787155  |
| C6  | -8.1036456104 | 3.8233075891  | 0.3302889374  |
| O7  | -4.7131553137 | 3.8356183748  | 1.4440385183  |
| C8  | -5.5563898535 | 3.2864285673  | 0.8905953439  |
| O9  | -7.7856324972 | 0.6395315347  | 2.0297346283  |
| C10 | -7.4375443489 | 1.3972845063  | 1.2327083676  |
| O11 | -6.3421031196 | 1.1964107477  | -5.1080457546 |
| C12 | -6.2282417695 | 1.2181919428  | -3.9576274761 |
| N13 | -3.4619099006 | -1.3485788877 | -1.4798232157 |
| C14 | -2.4676425935 | -2.3597667606 | -1.0655261578 |
| H15 | -2.9480497579 | -3.1043390230 | -0.4254447121 |
| H16 | -2.0100126425 | -2.8777677328 | -1.9226384521 |
| H17 | -1.6734287194 | -1.8791055954 | -0.4881805022 |
| C18 | -4.5750452895 | -1.9903082768 | -2.2046782579 |
| H19 | -4.7534602780 | -2.9792057946 | -1.7711780918 |
| H20 | -4.3256685787 | -2.1481761792 | -3.2677893925 |
| C21 | -2.8147056552 | -0.3069189405 | -2.2976597078 |
| H22 | -2.6374469194 | -0.6662320772 | -3.3261209150 |
| H23 | -1.8327224074 | -0.0883553271 | -1.8668387015 |
| P24 | -6.1872782850 | -1.0408408023 | -2.1060346670 |
| P25 | -3.7418097233 | 1.3276344109  | -2.4119014903 |
| C26 | -7.1236459745 | -1.7854055130 | -3.5108905444 |
| H27 | -6.6886219162 | -1.4901135147 | -4.4681043667 |
| H28 | -7.1339173246 | -2.8772504438 | -3.4432303387 |
| H29 | -8.1534277450 | -1.4197384674 | -3.4735039658 |
| C30 | -7.0279260232 | -1.8634927420 | -0.6708590107 |
| H31 | -7.3404124378 | -2.8732768118 | -0.9530867429 |
| H32 | -6.3550693419 | -1.9533630250 | 0.1844218132  |
| H33 | -7.9104670779 | -1.2933445510 | -0.3739758760 |
| C34 | -3.1362377388 | 1.9341604027  | -4.0467219926 |
| H35 | -3.5150216718 | 1.3084799721  | -4.8582587581 |
| H36 | -3.5016883350 | 2.9532462963  | -4.1986637312 |
| H37 | -2.0427384074 | 1.9433628147  | -4.0827787879 |
| C38 | -2.7984925307 | 2.4338720020  | -1.2722493767 |
| H39 | -1.7313806368 | 2.4087964621  | -1.5156308740 |
| H40 | -3.1627853074 | 3.4562482202  | -1.3987723812 |
| H41 | -2.9344933490 | 2.1500480751  | -0.2286560322 |
| C42 | -7.4139720464 | 4.4075245114  | -2.8104601959 |
| H43 | -7.8328857921 | 5.1175411085  | -2.0912460179 |
| H44 | -6.9288117123 | 4.9944344724  | -3.5957619680 |

|     |               |               |               |
|-----|---------------|---------------|---------------|
| C45 | -9.2508999573 | 2.6077541005  | -2.4676783781 |
| H46 | -9.9823874215 | 2.0157677421  | -3.0252218168 |
| H47 | -9.8040810404 | 3.1763515786  | -1.7145400201 |
| C48 | -8.5017505740 | 3.5302455450  | -3.4257390814 |
| H49 | -9.2432514612 | 4.2014027489  | -3.8812377213 |
| H50 | -8.0825860934 | 2.9443730194  | -4.2472855309 |
| H51 | -5.4696666294 | 1.0934136031  | 0.1165495582  |
| C52 | -2.1892714903 | 1.2559860794  | 4.0714491804  |
| C53 | -3.5734938911 | 1.2080727706  | 4.2433711478  |
| C54 | -4.4044582370 | 0.8199041963  | 3.1929118286  |
| C55 | -3.8456474982 | 0.4767498852  | 1.9569110992  |
| C56 | -2.4575070570 | 0.5093706548  | 1.7852399871  |
| C57 | -1.6350700242 | 0.9003965787  | 2.8415858672  |
| H58 | -1.5469870960 | 1.5585226150  | 4.8924346091  |
| H59 | -4.0122609356 | 1.4698117790  | 5.2014337742  |
| H60 | -5.4792331806 | 0.7715905262  | 3.3409299296  |
| H61 | -2.0176665770 | 0.2138649225  | 0.8373684038  |
| H62 | -0.5580981549 | 0.9182196432  | 2.7034844228  |
| H63 | -4.2080566816 | -0.4348577952 | 0.1265473239  |
| H64 | -5.4819718265 | -0.4536526905 | 1.2006250444  |
| N65 | -4.7047990766 | 0.1072166616  | 0.8583545126  |

Cartesian coordinates of **Figure S5e**

**E (M06/LACV3P\*\*\*+ 2f(Ru)) = -2630.05374387562**

**ZPE (kcal mol<sup>-1</sup>) = 239.986**

**G<sub>solv</sub> = -0.0135451**

**DH<sub>298</sub> (kcal mol<sup>-1</sup>) = 21.346**

**DS<sub>298</sub> (cal K<sup>-1</sup> mol<sup>-1</sup>) = 204.396**

| atom | x             | y             | z             |
|------|---------------|---------------|---------------|
| S1   | -6.1596736004 | 3.5456027668  | -1.6849571658 |
| Fe2  | -5.8023188247 | 1.2894084092  | -2.0035702985 |
| S3   | -7.9964914297 | 1.0264519142  | -1.3422432522 |
| Fe4  | -6.7879946977 | 2.3047358679  | 0.1773576813  |
| O5   | -8.9163155421 | 4.0031373780  | 1.2760000933  |
| C6   | -8.0836147452 | 3.3366746343  | 0.8311036334  |
| O7   | -4.4841226439 | 3.4622800785  | 1.5638215086  |
| C8   | -5.3795848602 | 2.9814869904  | 1.0069604124  |
| O9   | -6.9706398085 | 0.0432870855  | 2.0274996672  |
| C10  | -6.8728472688 | 0.9278082086  | 1.2850880088  |
| O11  | -6.0407928969 | 1.0743533608  | -4.8931313330 |
| C12  | -5.9264820368 | 1.1464254655  | -3.7376263901 |
| N13  | -2.7539343540 | -1.0075022535 | -2.5447420639 |
| C14  | -1.6629322846 | -1.8657792709 | -3.0087638026 |

|     |               |               |               |
|-----|---------------|---------------|---------------|
| H15 | -1.7396268278 | -2.8475800700 | -2.5320211802 |
| H16 | -1.6617411099 | -2.0133957827 | -4.1048033830 |
| H17 | -0.7026423113 | -1.4265134573 | -2.7223456165 |
| C18 | -4.0578468995 | -1.6118336688 | -2.8170651713 |
| H19 | -3.9857927907 | -2.6879435047 | -2.6253695365 |
| H20 | -4.3700013528 | -1.4870550396 | -3.8718984955 |
| C21 | -2.6275162308 | 0.3480958896  | -3.0794274769 |
| H22 | -2.9750316350 | 0.4235390843  | -4.1279119494 |
| H23 | -1.5677749236 | 0.6252715685  | -3.0686898026 |
| P24 | -5.4227228354 | -0.9511601236 | -1.7209245863 |
| P25 | -3.5390384621 | 1.6305481100  | -2.0670128192 |
| C26 | -6.8023470656 | -2.0654769896 | -2.2403371917 |
| H27 | -7.0977644607 | -1.8274423755 | -3.2656539356 |
| H28 | -6.5063368027 | -3.1178645532 | -2.1788300791 |
| H29 | -7.6657651071 | -1.8914267858 | -1.5951030305 |
| C30 | -4.9269279205 | -1.6834252714 | -0.0978335601 |
| H31 | -4.7825316612 | -2.7651012731 | -0.1917334614 |
| H32 | -3.9905573442 | -1.2289923954 | 0.2321223215  |
| H33 | -5.6918796505 | -1.4864062560 | 0.6539049854  |
| C34 | -2.9882773302 | 3.1622773937  | -2.9414352718 |
| H35 | -3.4342561096 | 3.1934593511  | -3.9390986778 |
| H36 | -3.3410177924 | 4.0365462863  | -2.3906796274 |
| H37 | -1.8973131795 | 3.1997952792  | -3.0263051748 |
| C38 | -2.4900609491 | 1.6574854924  | -0.5454670392 |
| H39 | -1.4384188959 | 1.8182912303  | -0.8060215562 |
| H40 | -2.8198371588 | 2.4510537237  | 0.1257473171  |
| H41 | -2.5834974206 | 0.7017904056  | -0.0257913605 |
| C42 | -7.6822361091 | 4.1920647941  | -2.5142980271 |
| H43 | -8.2300929808 | 4.7609666489  | -1.7558337062 |
| H44 | -7.3218904073 | 4.9047471713  | -3.2629495241 |
| C45 | -9.1884736386 | 2.1259006866  | -2.2334457195 |
| H46 | -9.8414286200 | 1.4488942406  | -2.7934674885 |
| H47 | -9.7991186749 | 2.6091131611  | -1.4635613655 |
| C48 | -8.5890468915 | 3.1615125848  | -3.1797487804 |
| H49 | -9.4200344357 | 3.7024131811  | -3.6569861490 |
| H50 | -8.0470453593 | 2.6569243824  | -3.9846291419 |

Cartesian coordinates of **Figure S5f**

**E (M06/LACV3P\*\*\*+ 2f(Ru)) = -2614.43296884257**

**ZPE (kcal mol<sup>-1</sup>) = 253.352**

**G<sub>solv</sub> = -0.0580328**

**DH<sub>298</sub> (kcal mol<sup>-1</sup>) = 21.474**

**DS<sub>298</sub> (cal K<sup>-1</sup> mol<sup>-1</sup>) = 203.502**

| atom | x | y | z |
|------|---|---|---|
|------|---|---|---|

|     |               |               |               |
|-----|---------------|---------------|---------------|
| S1  | -6.1283436562 | 3.5412786340  | -1.6399558970 |
| Fe2 | -5.7469001034 | 1.2556070770  | -1.9668743636 |
| S3  | -7.9778439730 | 1.0074346140  | -1.3060081579 |
| Fe4 | -6.7603461588 | 2.2850948012  | 0.2283136435  |
| O5  | -9.0314572961 | 4.0355981512  | 0.9236253980  |
| C6  | -8.1466901682 | 3.3560810195  | 0.6737503667  |
| O7  | -4.7142315073 | 3.7273049755  | 1.7994201349  |
| C8  | -5.5168423737 | 3.1720249664  | 1.2048949348  |
| O9  | -7.2843211020 | 0.2060216725  | 2.2624331212  |
| C10 | -7.0858797903 | 1.0223558384  | 1.4876910413  |
| O11 | -5.9772849973 | 1.0352050870  | -4.8683424387 |
| C12 | -5.8939778823 | 1.1283782499  | -3.7214331554 |
| C14 | -1.5789177551 | -1.9732346937 | -3.3646171726 |
| H15 | -1.6011964741 | -3.0107915761 | -3.0167100301 |
| H16 | -1.7768417054 | -1.9759524166 | -4.4426934433 |
| H17 | -0.5651919349 | -1.5904575010 | -3.2104198779 |
| C18 | -4.0224433753 | -1.7129765871 | -2.8174004564 |
| H19 | -3.9935297204 | -2.7914788515 | -2.6193136715 |
| H20 | -4.3240325963 | -1.5976494186 | -3.8668786697 |
| C21 | -2.5190982434 | 0.3475192080  | -3.0940075485 |
| H22 | -2.8544666335 | 0.4163841507  | -4.1373014478 |
| H23 | -1.4700000782 | 0.6676986108  | -3.0834767735 |
| P24 | -5.3982332627 | -1.0228764597 | -1.7804059066 |
| P25 | -3.4694374047 | 1.6221261619  | -2.1358753607 |
| C26 | -6.8054799558 | -2.0905760813 | -2.3050685656 |
| H27 | -7.0767492240 | -1.8613788000 | -3.3391182225 |
| H28 | -6.5317637849 | -3.1474177605 | -2.2327072554 |
| H29 | -7.6751248446 | -1.8990138761 | -1.6735571970 |
| C30 | -5.0142882271 | -1.6613808178 | -0.0918350645 |
| H31 | -4.8085404728 | -2.7357145970 | -0.1253948354 |
| H32 | -4.1470324418 | -1.1473765857 | 0.3290051969  |
| H33 | -5.8657817347 | -1.4910757667 | 0.5705178148  |
| C34 | -2.9752412246 | 3.1651377797  | -3.0136457914 |
| H35 | -3.4071600244 | 3.1725610697  | -4.0180380936 |
| H36 | -3.3496351978 | 4.0374885530  | -2.4746046589 |
| H37 | -1.8858467629 | 3.2288701491  | -3.0921778994 |
| C38 | -2.5332353506 | 1.7423138411  | -0.5497654630 |
| H39 | -1.4627588398 | 1.8605208420  | -0.7439906247 |
| H40 | -2.8810342059 | 2.6066943462  | 0.0199943892  |
| H41 | -2.6865286335 | 0.8483673384  | 0.0592336279  |
| C42 | -7.6411386997 | 4.1761234638  | -2.4979086569 |
| H43 | -8.1915079153 | 4.7776564224  | -1.7681149418 |
| H44 | -7.2509913876 | 4.8659553733  | -3.2516157069 |
| C45 | -9.1544531526 | 2.1021469432  | -2.2253560060 |

|     |               |               |               |
|-----|---------------|---------------|---------------|
| H46 | -9.7751284767 | 1.4064051048  | -2.7970821861 |
| H47 | -9.8030232652 | 2.5694889513  | -1.4781583121 |
| C48 | -8.5420662870 | 3.1393956120  | -3.1609181985 |
| H49 | -9.3695818488 | 3.6800938884  | -3.6404226866 |
| H50 | -7.9990727515 | 2.6375123394  | -3.9663407573 |
| H51 | -5.5342189002 | 1.3265191561  | -0.2610307941 |
| C51 | -2.6149659034 | -1.1156391512 | -2.6158217108 |
| H52 | -2.3620913359 | -1.1564027861 | -1.5469599807 |

Cartesian coordinates of **Figure S5g**

**E (M06/LACV3P\*\*\*+ 2f(Ru)) = -2901.8497757289**

**ZPE (kcal mol<sup>-1</sup>) = 326.902**

**G<sub>solv</sub> = -0.06204**

**DH<sub>298</sub> (kcal mol<sup>-1</sup>) = 25.834**

**DS<sub>298</sub> (cal K<sup>-1</sup> mol<sup>-1</sup>) = 238.085**

| atom | x             | y             | z             |
|------|---------------|---------------|---------------|
| S1   | -6.2050976211 | 3.4831822406  | -1.8719550960 |
| Fe2  | -5.8166855630 | 1.2790807104  | -2.3982826743 |
| S3   | -7.8542890824 | 0.8485258409  | -1.4355021906 |
| Fe4  | -6.6531105651 | 2.2180587168  | 0.0554993140  |
| O5   | -9.0241356456 | 3.6979853943  | 0.9925996775  |
| C6   | -8.1123823042 | 3.1291655413  | 0.5899831686  |
| O7   | -4.7131400856 | 3.9605775666  | 1.3857757731  |
| C8   | -5.4866462490 | 3.2702090842  | 0.8765024532  |
| O9   | -6.8512788479 | 0.0535188274  | 2.0171239349  |
| C10  | -6.7700890199 | 0.9076553734  | 1.2435077898  |
| O11  | -6.4856209350 | 1.2807040963  | -5.2208577251 |
| C12  | -6.2265473484 | 1.2794394433  | -4.0932133337 |
| C13  | -1.4071958703 | -1.7199959221 | -3.4197082523 |
| H14  | -1.4090866831 | -2.7007314595 | -2.9334187138 |
| H15  | -1.4245959725 | -1.8838640172 | -4.5034078554 |
| H16  | -0.4625165275 | -1.2240566664 | -3.1733486434 |
| C17  | -3.9216510824 | -1.6243416440 | -3.3006689199 |
| H18  | -3.8256302290 | -2.6829821673 | -3.0302547405 |
| H19  | -4.0879295707 | -1.5982226208 | -4.3856222809 |
| C20  | -2.5592437106 | 0.5094909066  | -3.6484282149 |
| H21  | -2.8264066847 | 0.4045468088  | -4.7081207640 |
| H22  | -1.5328106358 | 0.8963782263  | -3.6293324950 |
| P23  | -5.4813989764 | -1.0088704261 | -2.4965611868 |
| P24  | -3.6475829496 | 1.8415264586  | -2.9436998140 |
| C25  | -6.7648835375 | -1.8638327070 | -3.5107641352 |
| H26  | -6.7827706416 | -1.4598498804 | -4.5258137387 |
| H27  | -6.5634031081 | -2.9381832302 | -3.5605139475 |



|     |               |               |               |
|-----|---------------|---------------|---------------|
| H28 | -7.7457405103 | -1.7058603678 | -3.0563922600 |
| C29 | -5.5582333251 | -1.9719416278 | -0.9268273343 |
| H30 | -5.5624904314 | -3.0447969471 | -1.1448727477 |
| H31 | -4.7005563200 | -1.7429081713 | -0.2932018794 |
| H32 | -6.4729044801 | -1.7181317011 | -0.3858741246 |
| C33 | -3.5464304093 | 3.1326195069  | -4.2572484445 |
| H34 | -4.0719179675 | 2.8011754222  | -5.1559965928 |
| H35 | -4.0207344394 | 4.0483113331  | -3.8965168786 |
| H36 | -2.5038022523 | 3.3441949559  | -4.5128562521 |
| C37 | -2.5732763161 | 2.5794401447  | -1.6332370017 |
| H38 | -1.6700253165 | 3.0105004012  | -2.0759909208 |
| H39 | -3.1150852180 | 3.3630807062  | -1.0983734284 |
| H40 | -2.2723411810 | 1.7973049895  | -0.9348856502 |
| C41 | -7.8478626182 | 4.0881135062  | -2.4862076167 |
| H42 | -8.3069915487 | 4.6334677082  | -1.6567674891 |
| H43 | -7.6018111526 | 4.8234599934  | -3.2577675827 |
| C44 | -9.2115875827 | 1.9000742907  | -2.1383345958 |
| H45 | -9.8460737968 | 1.1979198163  | -2.6871509920 |
| H46 | -9.7971931447 | 2.2636322420  | -1.2893830542 |
| C47 | -8.7975982118 | 3.0414652237  | -3.0652880701 |
| H48 | -9.7154236650 | 3.5651095358  | -3.3674977888 |
| H49 | -8.3712189326 | 2.6300449083  | -3.9834070228 |
| H50 | -4.8473736016 | 1.2367499433  | 0.3334610516  |
| C51 | -1.6071483566 | -2.6194638076 | 1.6811550165  |
| C52 | -1.0152002471 | -1.5241702203 | 1.0518853349  |
| C53 | -1.7181113639 | -0.3256864588 | 0.9142863212  |
| C54 | -3.0240706059 | -0.2324584168 | 1.4020760356  |
| C55 | -3.6222091514 | -1.3232796979 | 2.0402180585  |
| C56 | -2.9070846035 | -2.5122924519 | 2.1799553242  |
| H57 | -1.0545889281 | -3.5467466398 | 1.7952692292  |
| H58 | 0.0033941092  | -1.5913532020 | 0.6822490080  |
| H59 | -1.2322537292 | 0.5361793305  | 0.4648981869  |
| H60 | -4.6340586629 | -1.2422051295 | 2.4271596702  |
| H61 | -3.3689895290 | -3.3556729496 | 2.6841301736  |
| C65 | -2.6131325868 | -0.8766512765 | -2.9698867399 |
| H66 | -2.5390481713 | -0.7504696883 | -1.8800848027 |
| N65 | -3.7768022251 | 0.9984737570  | 1.2584891682  |
| H67 | -4.2638245291 | 1.2050459206  | 2.1311003426  |
| H68 | -3.1566133423 | 1.7876186923  | 1.0803092289  |

Cartesian coordinates of **Figure S5h**

**E (M06/LACV3P\*\*\* 2f(Ru))** = -2614.03364430053

**ZPE (kcal mol<sup>-1</sup>)** = 247.496

**G<sub>solv</sub>** = -0.0133038

**DH<sub>298</sub> (kcal mol<sup>-1</sup>)** = 21.339

$DS_{298}$  (cal K<sup>-1</sup> mol<sup>-1</sup>)= 203.756

| atom | x             | y             | z             |
|------|---------------|---------------|---------------|
| S1   | -6.1590896540 | 3.5409802904  | -1.7138226776 |
| Fe2  | -5.7852986216 | 1.2795857701  | -1.9843326490 |
| S3   | -7.9974708726 | 1.0253394446  | -1.3777515644 |
| Fe4  | -6.8267051674 | 2.3264571501  | 0.1522541482  |
| O5   | -8.9812945541 | 4.0343226357  | 1.1827684656  |
| C6   | -8.1386426376 | 3.3644082899  | 0.7624839531  |
| O7   | -4.5549793376 | 3.5068215308  | 1.5716675319  |
| C8   | -5.4381915941 | 3.0171907712  | 1.0025962760  |
| O9   | -7.0457092240 | 0.0888949069  | 2.0268297390  |
| C10  | -6.9337297423 | 0.9644660666  | 1.2754499599  |
| O11  | -5.9193102605 | 0.9879757343  | -4.8735287830 |
| C12  | -5.8537748902 | 1.0959843834  | -3.7166636870 |
| C13  | -1.6676175256 | -1.9160880251 | -3.4171933612 |
| H14  | -1.6823939894 | -2.9666144997 | -3.1073511046 |
| H15  | -1.9149810711 | -1.8782197435 | -4.4849521444 |
| H16  | -0.6441815534 | -1.5445101086 | -3.2974875839 |
| C17  | -4.0821302071 | -1.6660259477 | -2.7429041494 |
| H18  | -4.0472682975 | -2.7474112893 | -2.5583573469 |
| H19  | -4.4255879800 | -1.5319675874 | -3.7770416727 |
| C20  | -2.5733640448 | 0.4007496825  | -3.0201804150 |
| H21  | -2.9363097708 | 0.5061747160  | -4.0510151892 |
| H22  | -1.5212298540 | 0.7133270239  | -3.0215734212 |
| P23  | -5.4086422917 | -0.9577280571 | -1.6414389378 |
| P24  | -3.5175679606 | 1.6352722257  | -1.9912456145 |
| C25  | -6.8107637977 | -2.0849812235 | -2.0629452533 |
| H26  | -7.1348360275 | -1.8920253462 | -3.0890683524 |
| H27  | -6.5124835165 | -3.1338042446 | -1.9648852565 |
| H28  | -7.6551085817 | -1.8804358154 | -1.4018156394 |
| C29  | -4.9042902217 | -1.6226416535 | 0.0122309200  |
| H30  | -4.6797696349 | -2.6928358863 | -0.0538418875 |
| H31  | -4.0232451157 | -1.0967208239 | 0.3865845774  |
| H32  | -5.7105897610 | -1.4708517009 | 0.7313101556  |
| C33  | -2.9532462277 | 3.2075272520  | -2.7806619140 |
| H34  | -3.3703958766 | 3.2767998688  | -3.7888079336 |
| H35  | -3.3247062437 | 4.0583027033  | -2.2062308165 |
| H36  | -1.8605179639 | 3.2487542060  | -2.8335432029 |
| C37  | -2.5225613142 | 1.6466276952  | -0.4286096632 |
| H38  | -1.4541337315 | 1.7403250851  | -0.6518227233 |
| H39  | -2.8314175671 | 2.4845939920  | 0.1980587809  |
| H40  | -2.6880523686 | 0.7288722998  | 0.1400207270  |
| C41  | -7.6617088086 | 4.1713040055  | -2.5900960192 |
| H42  | -8.2302573582 | 4.7493555040  | -1.8540350762 |

|     |               |               |               |
|-----|---------------|---------------|---------------|
| H43 | -7.2840372576 | 4.8742550806  | -3.3394715498 |
| C44 | -9.1691905459 | 2.1077966475  | -2.3151707375 |
| H45 | -9.8072382799 | 1.4201677616  | -2.8794314688 |
| H46 | -9.7988885865 | 2.6026402971  | -1.5683008761 |
| C47 | -8.5468420476 | 3.1275870067  | -3.2630908964 |
| H48 | -9.3644620232 | 3.6565806474  | -3.7752611912 |
| H49 | -7.9785717834 | 2.6088612444  | -4.0409602938 |
| C50 | -2.6633913217 | -1.0790974642 | -2.5943820845 |
| H51 | -2.3609626576 | -1.1584037171 | -1.5404383298 |

Cartesian coordinates of **Figure S5i**

**E (M06/LACV3P\*\*\*+ 2f(Ru)) = -2917.9020657002**

**ZPE (kcal mol<sup>-1</sup>) = 321.973**

**G<sub>solv</sub> = -0.065728**

**DH<sub>298</sub> (kcal mol<sup>-1</sup>) = 25.276**

**DS<sub>298</sub> (cal K<sup>-1</sup> mol<sup>-1</sup>) = 233.885**

| atom | x             | y             | z             |
|------|---------------|---------------|---------------|
| S1   | -6.2765782838 | 3.6625121632  | -1.6581051135 |
| Fe2  | -6.1979035343 | 1.4809102378  | -2.3897868726 |
| S3   | -8.3060376590 | 1.2688735118  | -1.4835319452 |
| Fe4  | -6.7503994638 | 2.1256826891  | 0.0329322518  |
| O5   | -8.7174188936 | 3.4418860303  | 1.7839147358  |
| C6   | -7.9508982919 | 2.9506800256  | 1.0817629591  |
| O7   | -4.2997891007 | 2.9724381916  | 1.3671213238  |
| C8   | -5.2857994355 | 2.6641492079  | 0.8293366810  |
| O9   | -6.4026035181 | -0.5462353699 | 1.1506798434  |
| C10  | -6.5768732872 | 0.5136551071  | 0.6859424261  |
| O11  | -6.8923756946 | 1.8418996306  | -5.1929699444 |
| C12  | -6.6066223239 | 1.6907373686  | -4.0819767609 |
| N13  | -3.2650839040 | -0.8429405693 | -1.4943147186 |
| C14  | -2.1436622169 | -1.8166027375 | -1.3332735513 |
| H15  | -2.3928307312 | -2.5305769310 | -0.5452721310 |
| H16  | -1.9656169061 | -2.3617531574 | -2.2671854552 |
| H17  | -1.2357253485 | -1.2825905324 | -1.0454085849 |
| C18  | -4.5311222576 | -1.6181533321 | -1.7089147960 |
| H19  | -4.8811337287 | -1.9426343355 | -0.7239519468 |
| H20  | -4.2976085933 | -2.5220032899 | -2.2862450869 |
| C21  | -2.9234882226 | 0.1035553257  | -2.5969111634 |
| H22  | -2.9857335116 | -0.4249557093 | -3.5571914242 |
| H23  | -1.8773079603 | 0.3956309290  | -2.4647784616 |
| P24  | -5.9996800072 | -0.7806467046 | -2.5501961229 |
| P25  | -3.9496573353 | 1.6819064003  | -2.7164655120 |
| C26  | -5.8106073348 | -1.3958541554 | -4.2883966848 |
| H27  | -4.9862474991 | -0.8927149351 | -4.8000861242 |
| H28  | -5.6483118465 | -2.4774877236 | -4.3219144144 |

|     |                |               |               |
|-----|----------------|---------------|---------------|
| H29 | -6.7277229180  | -1.1635055345 | -4.8368188315 |
| C30 | -7.3217722461  | -1.9182513157 | -1.9452334651 |
| H31 | -7.0462002860  | -2.9611710879 | -2.1303885657 |
| H32 | -7.5028467130  | -1.7706578973 | -0.8796986409 |
| H33 | -8.2464669645  | -1.6923418452 | -2.4804250159 |
| C34 | -3.4625192928  | 2.1840661933  | -4.4282277910 |
| H35 | -3.9174543355  | 1.5234948857  | -5.1700957384 |
| H36 | -3.8418123958  | 3.1949427538  | -4.6027056832 |
| H37 | -2.3764364655  | 2.1886501295  | -4.5625039561 |
| C38 | -2.9208720836  | 2.8671464475  | -1.7365875913 |
| H39 | -1.9034701416  | 2.9105070923  | -2.1371632137 |
| H40 | -3.3752625332  | 3.8583952672  | -1.8050037844 |
| H41 | -2.8848363330  | 2.6004009803  | -0.6802399532 |
| C42 | -7.8242211588  | 4.5714723748  | -2.1120607663 |
| H43 | -8.1849318582  | 5.0310696450  | -1.1864522201 |
| H44 | -7.4940960683  | 5.3783995954  | -2.7728290900 |
| C45 | -9.4863883423  | 2.6119788850  | -1.9626238174 |
| H46 | -10.2743951571 | 2.1007941950  | -2.5233737988 |
| H47 | -9.9314500609  | 2.9755664851  | -1.0311411457 |
| C48 | -8.9242971930  | 3.7626973579  | -2.7899853840 |
| H49 | -9.7536802810  | 4.4491821204  | -3.0112655489 |
| H50 | -8.5715009600  | 3.3895303125  | -3.7555425989 |
| H51 | -3.3303946883  | -0.2990724890 | -0.2255017454 |
| C52 | -0.0358454664  | -1.3787814796 | 3.2197867195  |
| C53 | 0.0470741628   | -0.1818551223 | 2.5063050903  |
| C54 | -1.0509462247  | 0.2817341069  | 1.7811911738  |
| C55 | -2.2298113506  | -0.4636887585 | 1.7814127494  |
| C56 | -2.3283765023  | -1.6571110184 | 2.4949132124  |
| C57 | -1.2228954953  | -2.1123580460 | 3.2149858989  |
| H58 | 0.8195855366   | -1.7337442576 | 3.7856287085  |
| H59 | 0.9643524572   | 0.3984956743  | 2.5182239737  |
| H60 | -0.9922158475  | 1.2212240953  | 1.2368491687  |
| H61 | -3.2589330383  | -2.2200560800 | 2.5041956480  |
| H62 | -1.2956777488  | -3.0369183621 | 3.7790002655  |
| H63 | -4.2448028186  | -0.3804054799 | 1.3576573685  |
| N64 | -3.3683493317  | 0.0052849329  | 0.9948955359  |
| H65 | -3.4576880872  | 1.0215241602  | 1.0782100317  |

Cartesian coordinates of **Figure S6A**

**E (M06/LACV3P\*\*++ 2f(Ru)) = -2901.90558515965**

**ZPE (kcal mol<sup>-1</sup>) = 327.495**

**G<sub>solv</sub> = -0.0584001**

**DH<sub>298</sub> (kcal mol<sup>-1</sup>) = 25.817**

**DS<sub>298</sub> (cal K<sup>-1</sup> mol<sup>-1</sup>) = 239.657**

| atom | x             | y             | z             |
|------|---------------|---------------|---------------|
| S1   | -6.1372432885 | 3.4629742814  | -2.0160930187 |
| Fe2  | -5.8413423434 | 1.2014349722  | -2.5647546116 |
| S3   | -7.9666489453 | 0.9211243556  | -1.6211279862 |
| Fe4  | -6.5352889287 | 2.0753738072  | -0.1760626494 |
| O5   | -8.6678047343 | 3.7616673216  | 0.9628264014  |
| C6   | -7.8301545528 | 3.1090598306  | 0.5380116422  |
| O7   | -4.2867489916 | 3.4397709424  | 1.1832961670  |
| C8   | -5.1590144008 | 2.8849105674  | 0.6893609778  |
| O9   | -6.9114790187 | -0.1586985003 | 1.7192060230  |
| C10  | -6.7378266541 | 0.7214458172  | 1.0115459464  |
| O11  | -6.4791457330 | 1.2148116302  | -5.4110793929 |
| C12  | -6.2325119452 | 1.2135765671  | -4.2838321296 |
| C13  | -1.9517930739 | -1.9189793729 | -4.7769504729 |
| H14  | -1.9415723886 | -2.9810360931 | -4.5118386342 |
| H15  | -2.3007004365 | -1.8354363693 | -5.8129353499 |
| H16  | -0.9201277305 | -1.5552760254 | -4.7409667512 |
| C17  | -4.2885134146 | -1.6899666127 | -3.8718560728 |
| H18  | -4.2450617233 | -2.7806784079 | -3.7683134406 |
| H19  | -4.7310768041 | -1.4886336044 | -4.8563540848 |
| C20  | -2.8091277817 | 0.3774300110  | -4.1987995232 |
| H21  | -3.2775742533 | 0.5257632437  | -5.1808414703 |
| H22  | -1.7637946896 | 0.6930040119  | -4.3066879978 |
| P23  | -5.4986827249 | -1.0854756071 | -2.6007710670 |
| P24  | -3.6060851979 | 1.5797561596  | -3.0276476175 |
| C25  | -6.9832453217 | -2.0966674680 | -3.0200611238 |
| H26  | -7.3832363950 | -1.7800924290 | -3.9891997548 |
| H27  | -6.7210003393 | -3.1575852696 | -3.0707418738 |
| H28  | -7.7600084816 | -1.9533815213 | -2.2644008401 |
| C29  | -4.8910012781 | -1.8665643798 | -1.0411274936 |
| H30  | -4.7279738191 | -2.9372953038 | -1.1943339337 |
| H31  | -3.9560854337 | -1.4092715116 | -0.7028767232 |
| H32  | -5.6344916414 | -1.7376903681 | -0.2486485386 |
| C33  | -3.2423646956 | 3.1696430336  | -3.8809250430 |
| H34  | -3.8192078132 | 3.2326502858  | -4.8059166293 |
| H35  | -3.5286837772 | 4.0069522123  | -3.2429810430 |
| H36  | -2.1766229016 | 3.2423357630  | -4.1187582834 |
| C37  | -2.4466747588 | 1.6255565587  | -1.5939365142 |
| H38  | -1.4167091814 | 1.7465976981  | -1.9448700730 |
| H39  | -2.6962004999 | 2.4688015105  | -0.9478692385 |
| H40  | -2.5135975906 | 0.7176410562  | -0.9929327836 |
| C41  | -7.7469508902 | 4.1734713531  | -2.5946281662 |
| H42  | -8.1779302438 | 4.7160611372  | -1.7475817026 |
| H43  | -7.4574573473 | 4.9209808966  | -3.3391300794 |

|     |               |               |               |
|-----|---------------|---------------|---------------|
| C44 | -9.2428754188 | 2.0911499319  | -2.2760874007 |
| H45 | -9.9483752280 | 1.4468115994  | -2.8085748042 |
| H46 | -9.7729566222 | 2.5003755538  | -1.4105709817 |
| C47 | -8.7510586871 | 3.1987515748  | -3.2029262146 |
| H48 | -9.6291669925 | 3.7812781899  | -3.5148958380 |
| H49 | -8.3366103295 | 2.7619373264  | -4.1155212317 |
| H50 | -5.4008468127 | 1.1438006961  | -0.9009799346 |
| C51 | -1.4806179515 | -1.6516777139 | 1.7536435539  |
| C52 | -1.1965521122 | -0.2830793764 | 1.8015231063  |
| C53 | -2.1010996584 | 0.6177971845  | 2.3721892693  |
| C54 | -3.3132052727 | 0.1614046711  | 2.9171129588  |
| C55 | -3.5906881664 | -1.2170135151 | 2.8750070084  |
| C56 | -2.6814844260 | -2.1073323043 | 2.2979389433  |
| H57 | -0.7654945611 | -2.3503739064 | 1.3232167535  |
| H58 | -0.2518005007 | 0.0883231745  | 1.4082109779  |
| H59 | -1.8597259382 | 1.6790072885  | 2.4093707871  |
| H60 | -4.5184784503 | -1.5919408457 | 3.3042573377  |
| H61 | -2.9093173558 | -3.1711664799 | 2.2876857807  |
| C65 | -2.8577071031 | -1.1174097546 | -3.8238997681 |
| H66 | -2.4574618453 | -1.2405612684 | -2.8081695669 |
| N65 | -4.2572223559 | 1.0701520801  | 3.4398308727  |
| H67 | -4.8689727926 | 0.6557178787  | 4.1357009307  |
| H68 | -3.8339993245 | 1.9148277865  | 3.8050312590  |

Cartesian coordinates of **Figure S6B**

**E (M06/LACV3P\*\*++ 2f(Ru)) = -2901.87158534037**

**ZPE (kcal mol<sup>-1</sup>) = 330.956**

**G<sub>solv</sub> = -0.0725484**

**DH<sub>298</sub> (kcal mol<sup>-1</sup>) = 25.677**

**DS<sub>298</sub> (cal K<sup>-1</sup> mol<sup>-1</sup>) = 240.775**

| atom | x             | y             | z             |
|------|---------------|---------------|---------------|
| S1   | -5.7680995214 | 3.2562031050  | -1.6126243942 |
| Fe2  | -5.9888112902 | 1.3113542895  | -2.8272685284 |
| S3   | -7.6032107915 | 0.7277120464  | -1.2897508353 |
| Fe4  | -5.6205315002 | 1.3761409764  | -0.2246330928 |
| O5   | -6.7457521978 | 2.4569418906  | 2.2688986546  |
| C6   | -6.3354383244 | 2.0601791659  | 1.2669364832  |
| O7   | -2.7889197185 | 1.8002593693  | 0.2798864276  |
| C8   | -3.9254821657 | 1.6891487731  | 0.0015350912  |
| O9   | -5.0194765963 | -1.3382863009 | 0.6235993048  |
| C10  | -5.3231498039 | -0.2779484107 | 0.2108321482  |
| O11  | -7.6068781988 | 2.2090951089  | -5.0661977459 |
| C12  | -6.9546159003 | 1.8447243066  | -4.1808208245 |
| C13  | -3.6736127802 | -0.9169995655 | -7.2086407506 |
| H14  | -3.7086638745 | -2.0060931163 | -7.3149525262 |

|     |               |               |               |
|-----|---------------|---------------|---------------|
| H15 | -4.3818638882 | -0.4869586517 | -7.9264072209 |
| H16 | -2.6689936078 | -0.5841293242 | -7.4890017426 |
| C17 | -5.4189383464 | -1.0171133483 | -5.3959740637 |
| H18 | -5.4882442518 | -2.0806475221 | -5.6563817078 |
| H19 | -6.1788086065 | -0.4983266575 | -5.9950435404 |
| C20 | -3.9079864559 | 1.0449240168  | -5.6473649605 |
| H21 | -4.6985082646 | 1.5185612758  | -6.2442731548 |
| H22 | -2.9532910152 | 1.3762504874  | -6.0745398955 |
| P23 | -5.9368874690 | -0.8588698866 | -3.6173401137 |
| P24 | -4.0188714915 | 1.7705079406  | -3.9390358431 |
| C25 | -7.5653712766 | -1.7250831105 | -3.6635067455 |
| H26 | -8.2783025305 | -1.1286211919 | -4.2390823618 |
| H27 | -7.4670859223 | -2.7131320557 | -4.1235810247 |
| H28 | -7.9570239464 | -1.8311119381 | -2.6500273916 |
| C29 | -4.8651606153 | -2.1201628148 | -2.7882208065 |
| H30 | -4.9011758110 | -3.0712670286 | -3.3296744029 |
| H31 | -3.8289751904 | -1.7755820109 | -2.7457794998 |
| H32 | -5.2107377337 | -2.2824586740 | -1.7655799816 |
| C33 | -3.7099971670 | 3.5507345507  | -4.3113278508 |
| H34 | -4.5604891203 | 3.9594090996  | -4.8635080349 |
| H35 | -3.6126311687 | 4.1128415430  | -3.3807103986 |
| H36 | -2.8008308405 | 3.6705127111  | -4.9084291882 |
| C37 | -2.4049149686 | 1.2576366777  | -3.1921170085 |
| H38 | -1.5770162827 | 1.4794281296  | -3.8735686650 |
| H39 | -2.2454119865 | 1.7958419826  | -2.2559753910 |
| H40 | -2.4066101303 | 0.1870924565  | -2.9729235571 |
| C41 | -7.3697556138 | 4.1126772004  | -1.2536408555 |
| H42 | -7.3740128397 | 4.3329199813  | -0.1813800179 |
| H43 | -7.2987648438 | 5.0677648310  | -1.7829144320 |
| C44 | -8.8745865023 | 2.0401126172  | -0.9902885194 |
| H45 | -9.8134342183 | 1.6028209020  | -1.3434756324 |
| H46 | -8.9560844665 | 2.1559423986  | 0.0952115107  |
| C47 | -8.6426245119 | 3.3844125316  | -1.6718564641 |
| H48 | -9.4954572492 | 4.0343303571  | -1.4291253921 |
| H49 | -8.6553455701 | 3.2556691352  | -2.7580878978 |
| H50 | -1.8889730708 | -0.9805610763 | 2.3335198003  |
| C51 | -4.1383506034 | 0.9260586190  | 6.0263324066  |
| C52 | -2.9284932603 | 1.4139110298  | 5.5263374100  |
| C53 | -2.4564905467 | 0.9817139650  | 4.2873470554  |
| C54 | -3.2210126077 | 0.0609716020  | 3.5782157915  |
| C55 | -4.4281799686 | -0.4404152019 | 4.0502153503  |
| C56 | -4.8850698885 | 0.0039414193  | 5.2927018079  |
| H57 | -4.5009068728 | 1.2699876015  | 6.9898186071  |
| H58 | -2.3516037484 | 2.1344705247  | 6.0967157446  |



|     |               |               |               |
|-----|---------------|---------------|---------------|
| H59 | -1.5196684042 | 1.3622660815  | 3.8889027723  |
| H60 | -5.0086731605 | -1.1483841454 | 3.4655126537  |
| H61 | -5.8274238702 | -0.3696621546 | 5.6795618673  |
| C65 | -4.0198382447 | -0.4881223672 | -5.7715610557 |
| H66 | -3.2774339195 | -0.9506422060 | -5.1053543252 |
| N65 | -2.7284596515 | -0.3978076756 | 2.2510565446  |
| H67 | -3.4568783327 | -0.9450887143 | 1.7596551423  |
| H68 | -2.5097801275 | 0.4068105974  | 1.6352622104  |

Cartesian coordinates of **Figure S7C**

**E (M06/LACV3P\*\*++ 2f(Ru)) = -2917.92279360219**

**ZPE (kcal mol<sup>-1</sup>) = 320.692**

**G<sub>solv</sub> = -0.06109**

**DH<sub>298</sub> (kcal mol<sup>-1</sup>) = 26.093**

**DS<sub>298</sub> (cal K<sup>-1</sup> mol<sup>-1</sup>) = 244.404**

| atom | x             | y             | z             |
|------|---------------|---------------|---------------|
| S1   | -6.2722772810 | 3.6957936218  | -2.3543186130 |
| Fe2  | -6.1608687023 | 1.3641161435  | -2.2260450278 |
| S3   | -8.4969972269 | 1.4528677470  | -2.2887028200 |
| Fe4  | -7.6242323940 | 2.8614775021  | -0.6374094734 |
| O5   | -9.7148981668 | 4.9181427295  | -0.9589789581 |
| C6   | -8.9059393859 | 4.1230356366  | -0.8151099158 |
| O7   | -5.9795177444 | 4.3726723870  | 1.2992229569  |
| C8   | -6.6244616413 | 3.7888169352  | 0.5591482274  |
| O9   | -9.0429167522 | 1.2438936077  | 1.3882691752  |
| C10  | -8.4978481059 | 1.8823782600  | 0.6130601459  |
| O11  | -5.5357271508 | 0.6625434996  | -4.9890941444 |
| C12  | -5.7882142751 | 0.9450569758  | -3.8991816658 |
| N13  | -3.4540403793 | -1.2977943661 | -1.3485767453 |
| C14  | -2.4089025868 | -2.3369995250 | -1.3223019231 |
| H15  | -2.7779480906 | -3.2154103322 | -0.7855939189 |
| H16  | -2.0970075218 | -2.6529149800 | -2.3321536938 |
| H17  | -1.5293340172 | -1.9614219751 | -0.7922311213 |
| C18  | -4.6654009276 | -1.8202839075 | -1.9845441506 |
| H19  | -4.8403089195 | -2.8354017426 | -1.6125970444 |
| H20  | -4.5642702625 | -1.8947433721 | -3.0841626511 |
| C21  | -2.9458292401 | -0.0925855198 | -2.0087222416 |
| H22  | -2.8691414855 | -0.2198248143 | -3.1055894973 |
| H23  | -1.9329924690 | 0.1014348662  | -1.6402819032 |
| P24  | -6.2216142293 | -0.8552838424 | -1.6235567122 |
| P25  | -3.9198933308 | 1.4706043685  | -1.6960353527 |
| C26  | -7.4545619920 | -1.8889803975 | -2.5227499384 |
| H27  | -7.2890382293 | -1.8177372258 | -3.6011270498 |
| H28  | -7.3801530007 | -2.9370783519 | -2.2167895328 |
| H29  | -8.4611638123 | -1.5248651562 | -2.3069415732 |



|     |               |               |               |
|-----|---------------|---------------|---------------|
| C30 | -6.5521713255 | -1.2363084538 | 0.1465684032  |
| H31 | -6.5343079456 | -2.3185616765 | 0.3124412024  |
| H32 | -5.7994222955 | -0.7598041305 | 0.7803752261  |
| H33 | -7.5393365811 | -0.8608660482 | 0.4249250478  |
| C34 | -2.9350720844 | 2.6551594396  | -2.7093553543 |
| H35 | -3.0502010789 | 2.4301058759  | -3.7730482086 |
| H36 | -3.2960025847 | 3.6704793061  | -2.5325326817 |
| H37 | -1.8745866116 | 2.6030737619  | -2.4441067724 |
| C38 | -3.4901811389 | 1.9199995367  | 0.0334963774  |
| H39 | -2.4045486691 | 1.9450186883  | 0.1675895348  |
| H40 | -3.8895094523 | 2.9105934123  | 0.2619923778  |
| H41 | -3.9113582799 | 1.1929693213  | 0.7332406456  |
| C42 | -7.3435434686 | 4.3118933398  | -3.7327102769 |
| H43 | -7.9906653965 | 5.0859092553  | -3.3089467507 |
| H44 | -6.6465524453 | 4.8135722374  | -4.4100171655 |
| C45 | -9.1635734163 | 2.4781742804  | -3.6784350923 |
| H46 | -9.6796336288 | 1.7576635130  | -4.3193507065 |
| H47 | -9.9297501110 | 3.1320604125  | -3.2508707484 |
| C48 | -8.1490049466 | 3.2677377438  | -4.4993494502 |
| H49 | -8.7030514871 | 3.7943339989  | -5.2886017083 |
| H50 | -7.4709302943 | 2.5794566421  | -5.0110419073 |
| H51 | -6.4631962491 | 1.7173909999  | -0.5679366513 |
| C52 | -0.3866076812 | 0.5287140604  | 4.3464690455  |
| C53 | -1.5996730255 | 0.2147072029  | 4.9633801408  |
| C54 | -2.6689496165 | -0.2773885206 | 4.2192417963  |
| C55 | -2.5394690775 | -0.4729634436 | 2.8359628121  |
| C56 | -1.3182251146 | -0.1637441083 | 2.2201189087  |
| C57 | -0.2542616251 | 0.3356865600  | 2.9716710894  |
| H58 | 0.4443277214  | 0.9112888591  | 4.9306512201  |
| H59 | -1.7163409709 | 0.3539104694  | 6.0345059526  |
| H60 | -3.6122081188 | -0.5109584672 | 4.7077544658  |
| H61 | -1.1971601268 | -0.3311403316 | 1.1517607006  |
| H62 | 0.6872668857  | 0.5630578023  | 2.4789805357  |
| H63 | -3.4012576434 | -1.2807786283 | 1.1609322547  |
| H64 | -4.2212950360 | -1.5874690956 | 2.5811672527  |
| N65 | -3.6448139295 | -0.9220054612 | 2.0789451537  |

Cartesian coordinates of **Figure S7D**

**E (M06/LACV3P\*\*++ 2f(Ru)) = -2917.90361987595**

**ZPE (kcal mol<sup>-1</sup>) = 323.703**

**G<sub>solv</sub> = -0.0664741**

**DH<sub>298</sub> (kcal mol<sup>-1</sup>) = 25.551**

**DS<sub>298</sub> (cal K<sup>-1</sup> mol<sup>-1</sup>) = 234.001**

| atom | x             | y            | z             |
|------|---------------|--------------|---------------|
| S1   | -6.0863177863 | 3.5937452326 | -2.0115869066 |

|     |               |               |               |
|-----|---------------|---------------|---------------|
| Fe2 | -6.1170234743 | 1.3150265089  | -2.2905707740 |
| S3  | -8.3197026322 | 1.4269868721  | -1.6489031435 |
| Fe4 | -6.9555160357 | 2.5414224161  | -0.1182429709 |
| O5  | -8.9552923453 | 4.5275417581  | 0.7269889874  |
| C6  | -8.1702856018 | 3.7617407989  | 0.3814933092  |
| O7  | -4.7106916008 | 3.7102041123  | 1.3641498545  |
| C8  | -5.5775072395 | 3.2189975146  | 0.7790168263  |
| O9  | -7.4503832095 | 0.4497312560  | 1.8611270637  |
| C10 | -7.2680888995 | 1.2722627425  | 1.0571684134  |
| O11 | -6.3781434030 | 1.1848688127  | -5.1847672882 |
| C12 | -6.2709096135 | 1.2276199638  | -4.0327239700 |
| N13 | -3.4882068891 | -1.2640807096 | -1.3115128560 |
| C14 | -2.4609257137 | -2.2741132741 | -0.9601556863 |
| H15 | -2.8836542420 | -3.0009576207 | -0.2610198076 |
| H16 | -2.0941771894 | -2.8137409390 | -1.8450996185 |
| H17 | -1.6106923363 | -1.7847887388 | -0.4776090533 |
| C18 | -4.6404488174 | -1.9515598355 | -1.9455091711 |
| H19 | -4.8555488752 | -2.8571027833 | -1.3695774761 |
| H20 | -4.3665309444 | -2.2779219202 | -2.9615486160 |
| C21 | -2.8964574252 | -0.2594871413 | -2.2299505204 |
| H22 | -2.7892562065 | -0.6893433831 | -3.2387585910 |
| H23 | -1.8869725865 | -0.0254207105 | -1.8776017561 |
| P24 | -6.2458656504 | -0.9681565467 | -2.0698940119 |
| P25 | -3.8272274519 | 1.3706613145  | -2.3871535358 |
| C26 | -6.9965010420 | -1.8102361762 | -3.5331062504 |
| H27 | -6.4422331729 | -1.5667716035 | -4.4423704299 |
| H28 | -7.0214094265 | -2.8965206046 | -3.4045000766 |
| H29 | -8.0203392084 | -1.4447645398 | -3.6498929166 |
| C30 | -7.2672737044 | -1.7390410567 | -0.7276403931 |
| H31 | -7.3193857057 | -2.8236278728 | -0.8634252022 |
| H32 | -6.8848616760 | -1.5249838575 | 0.2713054903  |
| H33 | -8.2770208727 | -1.3250374910 | -0.7799754489 |
| C34 | -3.1557256689 | 1.9440343418  | -4.0092421602 |
| H35 | -3.5340380159 | 1.3227875360  | -4.8243370784 |
| H36 | -3.4974777697 | 2.9692836436  | -4.1752077362 |
| H37 | -2.0616713809 | 1.9299116568  | -4.0210990560 |
| C38 | -2.8723143875 | 2.4654622565  | -1.2396559543 |
| H39 | -1.8127847352 | 2.4730899405  | -1.5147874190 |
| H40 | -3.2644246423 | 3.4818161429  | -1.3204379776 |
| H41 | -2.9661628348 | 2.1546179050  | -0.1981143312 |
| C42 | -7.4654188375 | 4.4731646624  | -2.8827481780 |
| H43 | -7.8987590083 | 5.1572626961  | -2.1465969596 |
| H44 | -6.9735721966 | 5.0834697011  | -3.6458540550 |
| C45 | -9.3070173079 | 2.6880762138  | -2.5814088743 |

|     |                |               |               |
|-----|----------------|---------------|---------------|
| H46 | -10.0435913959 | 2.1071015743  | -3.1441189506 |
| H47 | -9.8534822466  | 3.2646332278  | -1.8288710416 |
| C48 | -8.5391653330  | 3.6038494446  | -3.5297593672 |
| H49 | -9.2685086094  | 4.2765802756  | -4.0027420377 |
| H50 | -8.1010375890  | 3.0149129825  | -4.3398182371 |
| H51 | -4.9878176894  | 0.7459790739  | 0.5808524152  |
| C52 | -1.9895438783  | 1.2023807643  | 4.2282258776  |
| C53 | -3.3728565188  | 1.1251477151  | 4.4014017961  |
| C54 | -4.1891262698  | 0.7001449464  | 3.3540257441  |
| C55 | -3.5990344843  | 0.3572349427  | 2.1387069098  |
| C56 | -2.2215878454  | 0.4212852802  | 1.9496238251  |
| C57 | -1.4158081375  | 0.8488175995  | 3.0069864773  |
| H58 | -1.3592576501  | 1.5365267342  | 5.0462813535  |
| H59 | -3.8210437116  | 1.3974468182  | 5.3515999976  |
| H60 | -5.2664280638  | 0.6429225784  | 3.4821963109  |
| H61 | -1.7761060869  | 0.1458633119  | 0.9988923027  |
| H62 | -0.3402088253  | 0.9039317817  | 2.8727772824  |
| H63 | -3.9866338841  | -0.5483293903 | 0.1954785423  |
| H64 | -5.2125230666  | -0.6706442095 | 1.3751027799  |
| N65 | -4.4731615586  | -0.0556640928 | 1.0261095557  |

Cartesian coordinates of **Figure S7E**

**E (M06/LACV3P\*\*++ 2f(Ru)) = -2917.91060219324**

**ZPE (kcal mol<sup>-1</sup>) = 324.667**

**G<sub>solv</sub> = -0.069401**

**DH<sub>298</sub> (kcal mol<sup>-1</sup>) = 25.036**

**DS<sub>298</sub> (cal K<sup>-1</sup> mol<sup>-1</sup>) = 228.924**

| atom | x             | y             | z             |
|------|---------------|---------------|---------------|
| S1   | -6.3239689843 | 3.6712000662  | -1.7131114044 |
| Fe2  | -6.2217210860 | 1.4832382089  | -2.4231343871 |
| S3   | -8.3249308105 | 1.2651798751  | -1.5049871125 |
| Fe4  | -6.7666864876 | 2.1461569424  | -0.0105991790 |
| O5   | -8.7558950052 | 3.4287953827  | 1.7361633957  |
| C6   | -7.9756283854 | 2.9495906519  | 1.0408339049  |
| O7   | -4.3833159856 | 3.1368395780  | 1.3577708462  |
| C8   | -5.3250647898 | 2.7475034359  | 0.8030179239  |
| O9   | -6.4189430071 | -0.5164731649 | 1.1378750503  |
| C10  | -6.5749866060 | 0.5387938915  | 0.6646158001  |
| O11  | -6.9101235239 | 1.7907450689  | -5.2365171245 |
| C12  | -6.6285953553 | 1.6622479272  | -4.1214971795 |
| N13  | -3.2884164590 | -0.7647868086 | -1.4280841350 |
| C14  | -2.1449180709 | -1.7117101529 | -1.1727620750 |
| H15  | -2.4190429886 | -2.3869719392 | -0.3623457603 |
| H16  | -1.9386221651 | -2.2742190417 | -2.0854237871 |
| H17  | -1.2698361884 | -1.1352742489 | -0.8717927503 |

|     |                |               |               |
|-----|----------------|---------------|---------------|
| C18 | -4.5635196863  | -1.5631531490 | -1.6101960407 |
| H19 | -4.9115591184  | -1.8070241925 | -0.6038915890 |
| H20 | -4.2904265223  | -2.4935009419 | -2.1170817286 |
| C21 | -2.9395272050  | 0.1581398129  | -2.5685944456 |
| H22 | -3.0112721866  | -0.4253777342 | -3.4904357020 |
| H23 | -1.8923139373  | 0.4431217233  | -2.4378243396 |
| P24 | -6.0123471023  | -0.7677519523 | -2.5289710879 |
| P25 | -3.9855452757  | 1.7245816078  | -2.7228581066 |
| C26 | -5.7613736110  | -1.4421273176 | -4.2376646548 |
| H27 | -4.9394711013  | -0.9370840170 | -4.7514822667 |
| H28 | -5.5778798628  | -2.5209570310 | -4.2328062409 |
| H29 | -6.6711014500  | -1.2475758767 | -4.8128105601 |
| C30 | -7.3274182791  | -1.9116045922 | -1.9204424830 |
| H31 | -7.0367080547  | -2.9552178606 | -2.0756907846 |
| H32 | -7.5330022057  | -1.7397598972 | -0.8632533543 |
| H33 | -8.2428712966  | -1.7086763904 | -2.4804390129 |
| C34 | -3.4645972207  | 2.1971301464  | -4.4332374814 |
| H35 | -3.9076503134  | 1.5259433898  | -5.1728915030 |
| H36 | -3.8451574548  | 3.2042448528  | -4.6269391037 |
| H37 | -2.3766254391  | 2.2063694994  | -4.5505219000 |
| C38 | -2.9707999579  | 2.9052321021  | -1.7263963611 |
| H39 | -1.9568580968  | 2.9760509782  | -2.1316467435 |
| H40 | -3.4432676838  | 3.8893226947  | -1.7673022526 |
| H41 | -2.9263234064  | 2.6043513612  | -0.6793527481 |
| C42 | -7.8762986179  | 4.5604848908  | -2.1880271805 |
| H43 | -8.2408403740  | 5.0342511083  | -1.2710756689 |
| H44 | -7.5507172249  | 5.3572878801  | -2.8630969939 |
| C45 | -9.5190717213  | 2.5897556601  | -2.0024695920 |
| H46 | -10.3048994750 | 2.0624247644  | -2.5510056411 |
| H47 | -9.9630823824  | 2.9653340324  | -1.0752615126 |
| C48 | -8.9694441272  | 3.7307767667  | -2.8512353240 |
| H49 | -9.8052117127  | 4.4056753072  | -3.0835803607 |
| H50 | -8.6139141255  | 3.3438264007  | -3.8104028526 |
| H51 | -3.3794986140  | -0.2249008677 | -0.5089628040 |
| C52 | 0.0769902785   | -1.6656915675 | 3.0848695716  |
| C53 | 0.1947918300   | -0.4087452783 | 2.4890509189  |
| C54 | -0.9152185310  | 0.2051460432  | 1.9087486109  |
| C55 | -2.1581634064  | -0.4376271436 | 1.9288216858  |
| C56 | -2.2816407043  | -1.6935303153 | 2.5326542847  |
| C57 | -1.1646581879  | -2.3019745559 | 3.1071633726  |
| H58 | 0.9423325166   | -2.1393375577 | 3.5372676180  |
| H59 | 1.1532315699   | 0.1019315577  | 2.4796088428  |
| H60 | -0.8201780698  | 1.1899206615  | 1.4560064291  |
| H61 | -3.2516773934  | -2.1853009640 | 2.5717775002  |

|     |               |               |              |
|-----|---------------|---------------|--------------|
| H62 | -1.2709361229 | -3.2725330760 | 3.5826332883 |
| H63 | -4.1590437556 | -0.1843327356 | 1.6562063573 |
| N64 | -3.2831932257 | 0.1637412276  | 1.2703153224 |
| H65 | -3.2855264928 | 1.1731966565  | 1.4035952470 |

---

(<sup>i</sup>) a) A. D. Becke, *J. Chem. Phys.* 1993, **98**, 5648-5652; b) C. Lee, W. Yang, R. G. Parr, *Phys. Rev. B* 1988, **37**, 785-789.

(<sup>ii</sup>) Y. Zhao, D. G. Truhlar, *Theor. Chem. Acc.* 2006, **120**, 215-241.

(<sup>iii</sup>) J.M.L. Martin and A. Sundermann, *J.Chem.Phys.*, 2001, **114**, 3408-3420

(<sup>iv</sup>) C. Gonzalez, H. B. Schlegel, *J.Chem.Phys.*, 1989, **90**, 2154; *J.Chem.Phys.*, 1990, **94**, 5523.

(<sup>v</sup>) B.Marten, K. Kim, C. Cortis, R. A. Friesner, R. B. Murphy, M. N. Ringnalda, D. Sitkoff and B. Honig, *J. Phys. Chem.*, 1996, **100**, 11775-11788.
